# Supplementary material
Source: PubMed Central journal article supplement (PMC10283080)
Supplement: NIHMS1891307-supplement-Supplementary_materials.pdf [file NIHMS1891307-supplement-Supplementary_materials.pdf]

## **Supplementary Material**

### **Gene editing to prevent ventricular arrhythmias associated with cardiomyocyte cell therapy**

Marchiano S., Nakamura K., Reinecke H., Neidig L., Lai M., Kadota S., Perbellini F., Yang X., Klaiman J. M., Blakley L. P., Karbassi E., Fields P. A., Fenix A. M., Beussman K. M., Jayabalu A., Kalucki F. A., Futakuchi-Tsuchida A., Weber G. J., Dupras S., Tsuchida H., Pabon L., Wang L., Knollmann B. C., Kattman S., Thies R. S., Sniadecki N., MacLellan W. R., Bertero A., and Murry C. E.

#### **Table of Contents:**

**Supplementary Figure 1 – RNA-seq analysis of *in vivo* transplanted hiPSC-CMs; related to Figure 1.**

**Supplementary Figure 2 – Pharmacological inhibition of hESC-CMs automaticity *in vitro*; related to Figure 1.**

**Supplementary Figure 3 – Characterization of gene-edited cell lines targeting phase 4 of action potential; related to Figures 2 and 3.**

**Supplementary Figure 4 – Genotyping and characterization of triple-edited cell lines; related to Figure 4.**

**Supplementary Figure 5 – Characterization of MEDUSA cell line; related to Figure 5.**

**Supplementary Figure 6 – Characterization of transplanted MEDUSA hESC-CMs; related to Figures 6 and 7.**

**Supplementary Table 1. Extended top 40 GO terms related to Figure 1 and Supplementary Fig. 1B.**

**Supplementary Table 2. Graft size quantification; related to histological analysis from Methods section - Histology (pig heart).**

**Supplementary Table 3. Oligonucleotides sequences for cloning gRNAs and genotyping; related to Methods section - *In vitro* experiments for hPSCs editing and hPSC-CMs characterization.**

**Supplementary Table 4. Oligonucleotides sequences for RTqPCR; related to Methods section - *In vitro* experiments for hPSCs editing and hPSC-CMs characterization.**

**Supplementary Video 1. Injection of hPSC-CMs into uninjured pig heart through direct thoracotomy; related to Methods section – Pig surgery.**

**Supplementary Video 2. Point stimulation of host myocardium and calcium transient elicited in graft (related to Figure 7D).**

**Supplementary Video 3. Point stimulation of graft and calcium transient elicited in host myocardium (related to Supplementary Fig. 6E).**

## Supplementary Figures

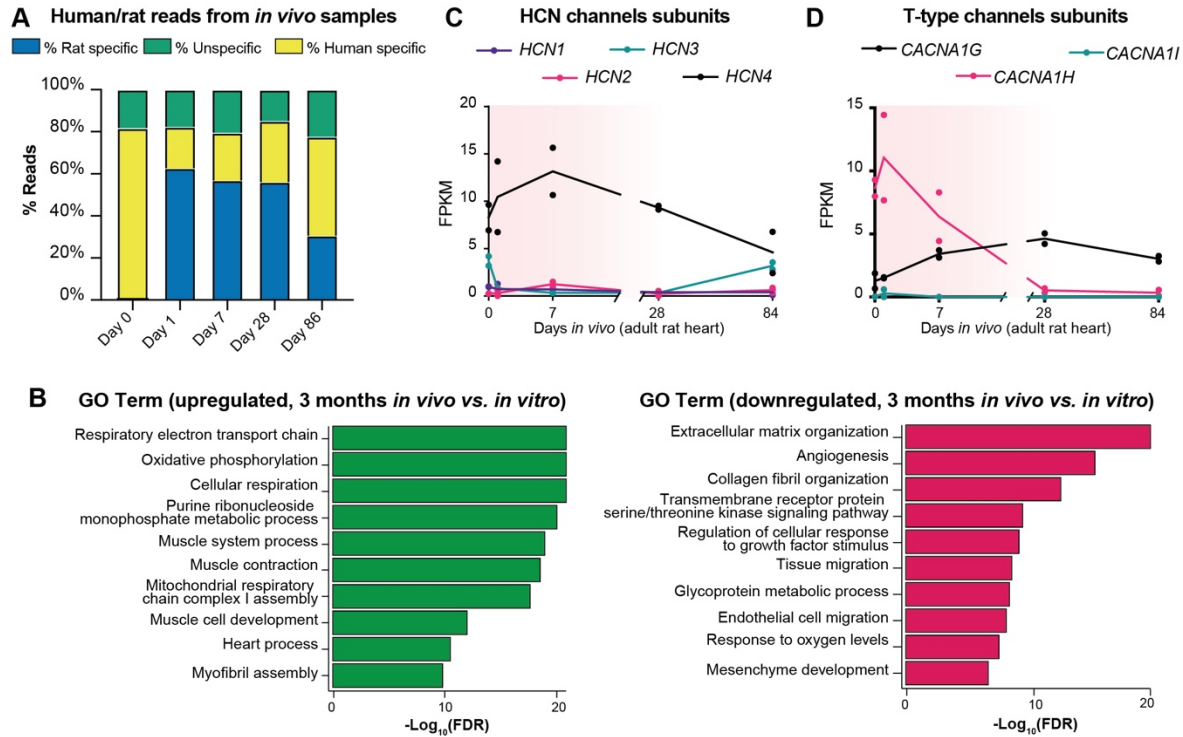

**Supplementary Fig. 1 – RNA-seq analysis of *in vivo* transplanted hiPSC-CMs.** (A) Percentage of human/rat reads from *in vivo* samples after laser capture microdissection in the experiment described in Figs. 1B-D. “Unspecific” indicates reads that do not uniquely map to either genome. (B) GO term analysis of selected upregulated and downregulated pathways at 3 months after hiPSC-CMs transplantation. See also Supplementary Table 1. (C) RNA-seq expression dynamics of HCN channel isoforms and (D) T-type calcium channel isoforms during *in vivo* maturation of hiPSC-CMs. See also Fig. 1F.

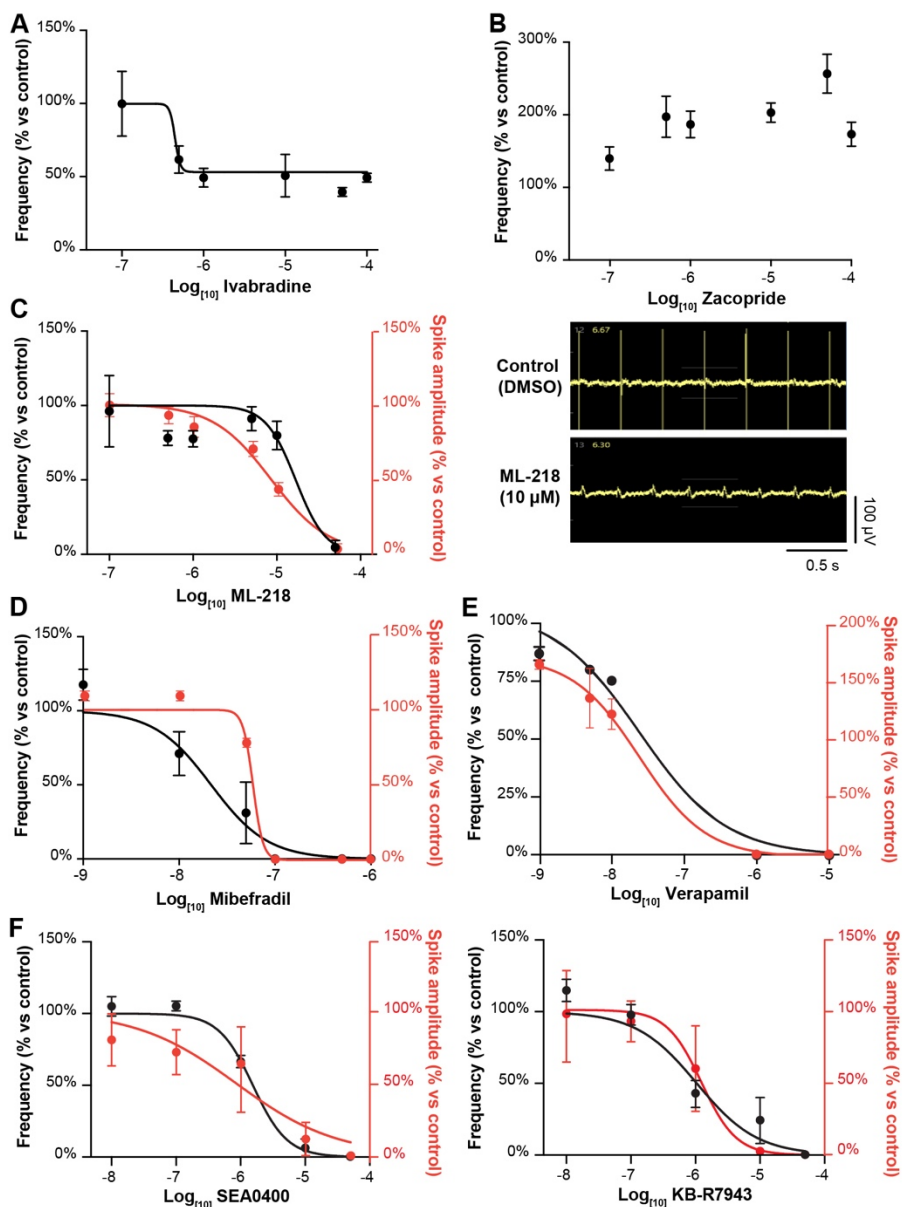

**Supplementary Fig. 2 – Pharmacological inhibition of hESC-CMs automaticity *in vitro*.** (A, B) Dose-response curves of Ivabradine ( $I_f$  inhibitor, A) and Zacopride ( $I_{K1}$  agonist, B) on MEA system. (C-F) Frequencies (left y-axis) and spike amplitude (right y-axis) dose-response curves and representative traces of ML218, Mibefradil ( $I_{CaT}$  inhibitors, C, D); Verapamil ( $I_{CaL}$  inhibitor, E) and SEA0400 and KB-R7943 ( $I_{NCX}$  inhibitors, F). Data shown as mean  $\pm$  SEM of 2 independent experiments each with 6 technical replicates, normalized on baseline and expressed as % vs. control (DMSO). Lines represents nonlinear regression of normalized response.

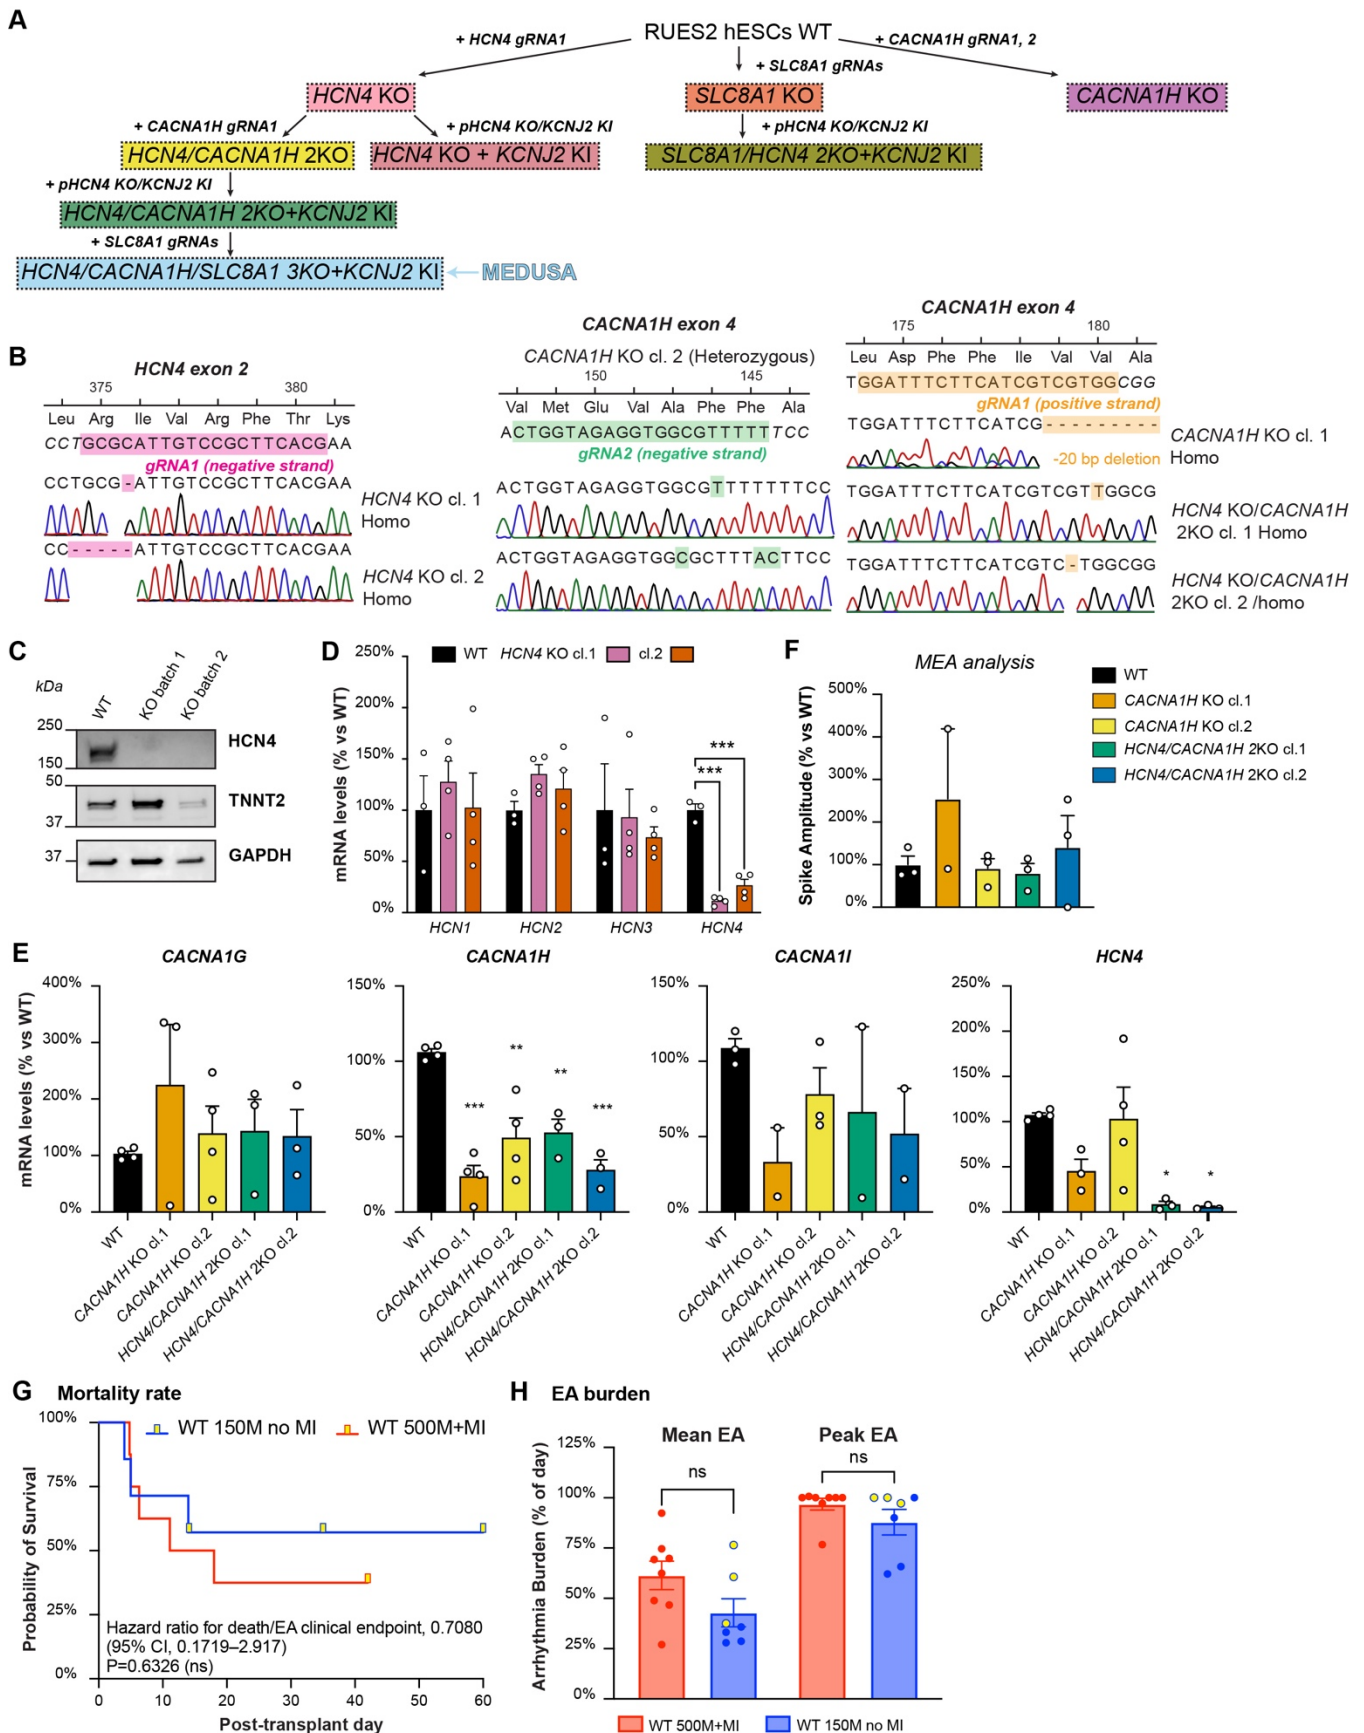

**Supplementary Fig. 3 – Characterization of gene-edited cell lines targeting phase 4 of action potential. (A)** Gene editing approach for the generation of the different cell lines. *pHCN4/KCNJ2* KI

indicates the targeting vector described in Fig. 3A. **(B)** Sanger sequencing validation of *HCN4* KO clones (*HCN4* KO cl.1 = 1 bp homozygous deletion; *HCN4* KO cl. 2 = 5 bp homozygous deletion), *CACNA1H* KO clones (*CACNA1H* KO cl.1= 20 bp homozygous deletion, *CACNA1H* KO cl.2= compound heterozygous indels leading to frameshift on the different alleles) and double edited cells (*HCN4/CACNA1H* KO cl.1= 1 bp homozygous insertion, *HCN4/CACNA1H* KO cl.2= 1 bp homozygous deletion). **(C)** Western blot for *HCN4*, *TNNT2* (cardiac troponin T) and *GAPDH* (loading control) in different batches of MEDUSA hESC-CMs, reported here with the parental line for simplicity. **(D, E)** Gene expression analyses by qRT-PCR of HCN channel subunits in *HCN4* KO, *CACNA1H* KO and *HCN4/CACNA1H* 2KO clones compared to WT in 4 independent batches of CMs. In some batches, *CACNA1H* was undetectable (cycle threshold > 40). Differences quantified by one-way ANOVA with Sidak correction for multiple comparisons (\*\*  $p < 0.01$ , \*\*\*  $p < 0.001$ ). **(F)** Spike amplitude of *CACNA1H* KO and *HCN4/CACNA1H* 2KO clones from MEA analysis. Data shown as mean  $\pm$  SEM of 2-3 independent experiments normalized on WT Spike amplitude. **(G)** Kaplan-Meier curve for freedom from EA mortality (described as death, unstable VT or heart failure necessitating either euthanasia or pharmacological intervention) in uninjured animals receiving 150M WT cells (n=7) or infarcted animals receiving 500M WT cells (n=8,). Yellow-colored marks on the treatment line indicate non-cardiac deaths due to opportunistic infection or planned euthanasia. **(H)** EA burden in uninjured and injured animals shown as mean and peak EA of animals receiving WT cells (Mann-Whitney test). Yellow-colored symbols represent animals that reached endpoint as described in the Method section. Data for 500M + MI in G and H from Nakamura K. et al., *Stem Cell Reports* 2021.

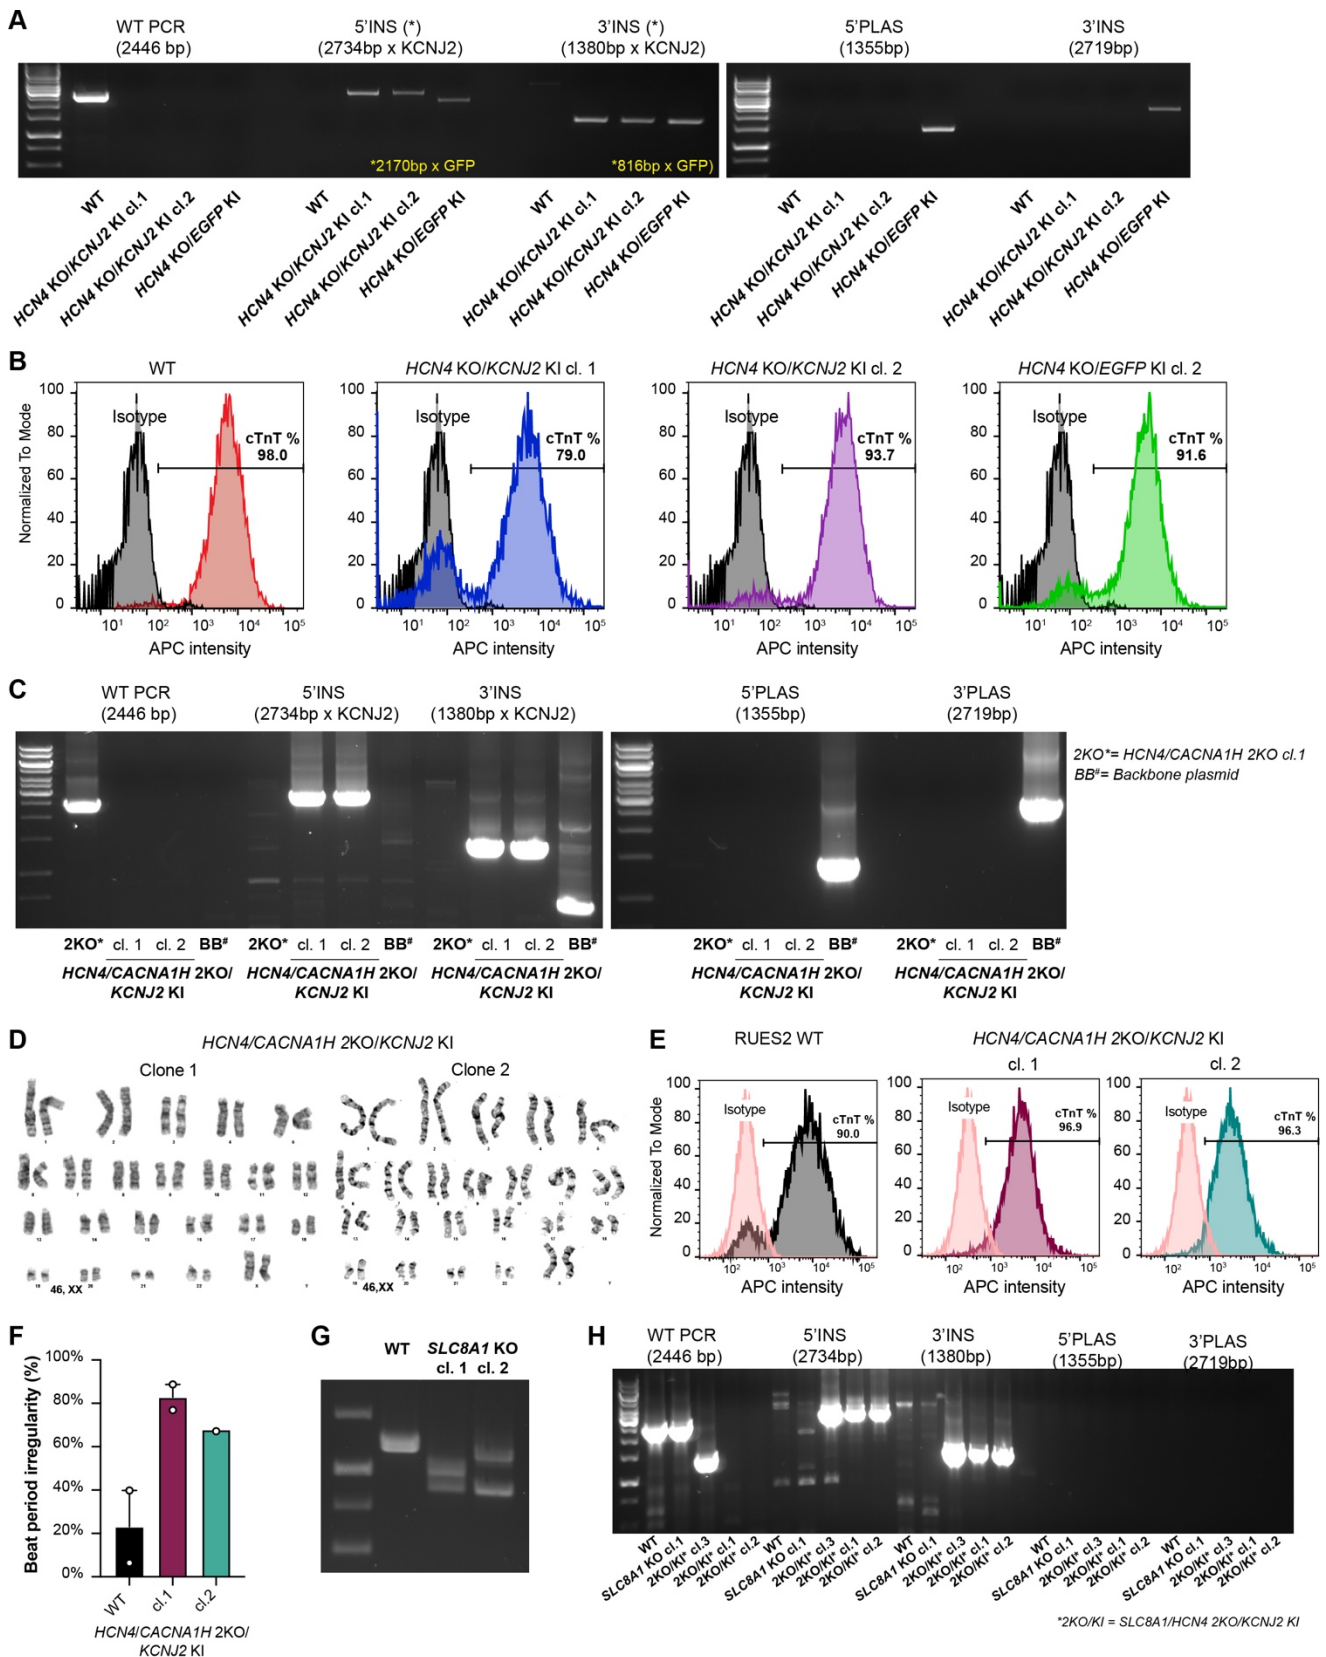

**Supplementary Fig. 4 – Genotyping and characterization of triple-edited cell lines. (A)** Genotyping of HCN4 KO/KCNJ2 KI clones generated with CRISPR/Cas9-mediated homology directed repair using

the targeting plasmid described in Fig. 3A. **(B)** Representative flow cytometry data of *HCN4* KO/*KCNJ2* KI clones at day 14 of differentiation stained for cardiac troponin T (cTnT, pan-CM marker). **(C)** Genotyping of *HCN4/CACNA1H* 2KO/*KCNJ2* KI clones generated with the targeting plasmid described in Fig. 3A. Refer also to Supplementary Fig. 3A for parental lines. **(D)** Karyotype analyses of *HCN4/CACNA1H* 2KO/*KCNJ2* KI clones. **(E)** Representative flow cytometry analysis of *HCN4/CACNA1H* 2KO/*KCNJ2* KI CMs at day 14 of differentiation stained for cTnT. **(F)** Beat period irregularity quantified as standard deviation of the beat period record in 100 sec, divided by the mean of the beat period in that same period. Data shown as mean  $\pm$  SEM of 2 independent experiment (for *HCN4/CACNA1H* 2KO/*KCNJ2* KI cl.2, n=1 due to lack of spontaneous activity in the second experiment that prevented calculation of beat irregularity). **(G)** Genotype of *SLC8A1* KO clones generated via combination of 3 gRNAs. **(H)** Genotype of *SLC8A1/HCN4* 2KO/*KCNJ2* KI clones generated with same approach described in Fig. 3A. Due to heterozygosity of clone 3, this clone was not used for further experiment.



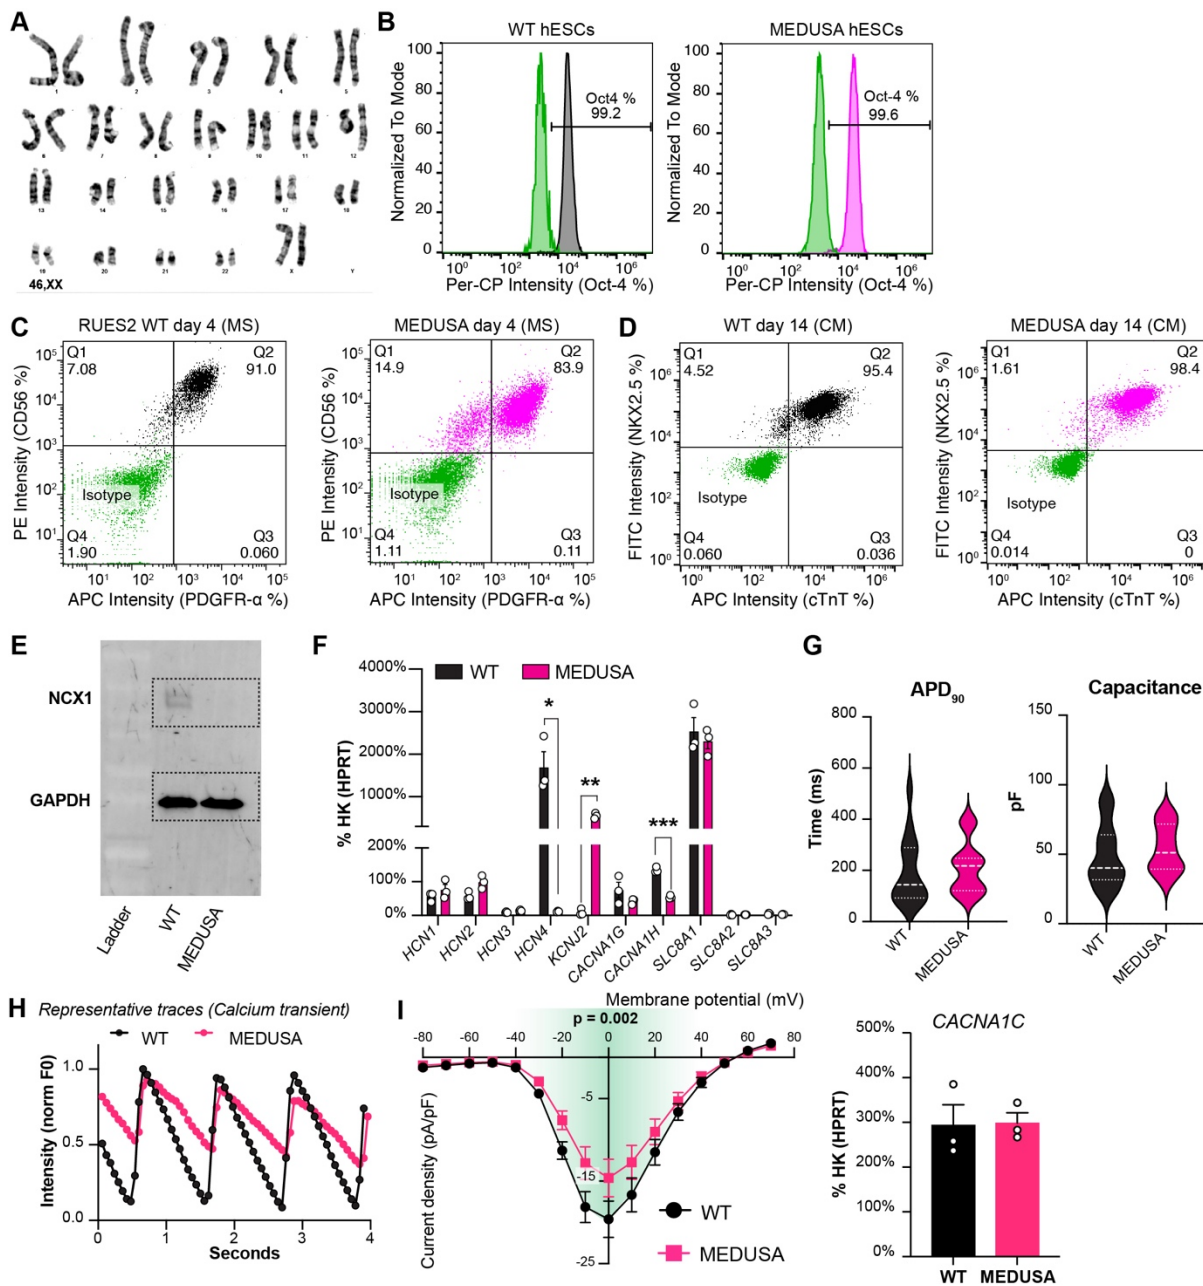

**Supplementary Fig. 5 – Characterization of MEDUSA cell line.** (A) Karyotype analysis of MEDUSA hESCs. (B) Representative flow cytometry analysis of MEDUSA hESCs and WT hESCs stained with Oct3/4 as pluripotency marker, as compared to respective isotype control. (C, D) Representative flow cytometry analysis of mesoderm markers (CD56/PDGFR $\alpha$ ) and ventricular markers (NKX2.5/cTnT) during cardiac differentiation in WT and MEDUSA, compared to isotype controls. MS= Mesoderm state. (E) Western blotting for NCX1 and GAPDH (loading control) in WT and MEDUSA hESC-CMs. Dotted squares represent inserts shown in Fig. 5A. (F) qRT-PCR analysis of genes encoding for  $I_f$ ,  $I_{CaT}$ ,  $I_{K1}$  and  $I_{NCX}$  in MEDUSA hESC-CMs, compared to WT-matched controls. Note the absence of nonsense-mediated decay for *SLC8A1*. Data shown as mean  $\pm$  SEM of 3 independent biological replicates. Differences vs. WT by multiple unpaired t test (\* p < 0.05, \*\* p < 0.01 and \*\*\* p < 0.001). See also Fig. 5A. (G) Action potential duration at 90% of repolarization (APD<sub>90</sub>) and capacitance current of WT and MEDUSA CMs. Data shown as described in Figs. 5E. (H) Representative calcium transient trace from WT and MEDUSA hESC-CMs. See also Fig. 5H. (I) Current density plot for  $I_{CaL}$  currents and qRT-PCR for *CACNA1C* in MEDUSA hESC-CMs, compared to WT controls. For I/V plot, data shown as mean  $\pm$  SEM of n = 22 for WT and n = 15 for MEDUSA hESC-CMs. Green-shaded area indicates difference vs.

WT hESC-CMs by two-way ANOVA with Sidak correction for multiple comparison ( $p = 0.002$ ). For qRT-PCR. Data shown as mean  $\pm$  SEM of 3 independent biological replicates.

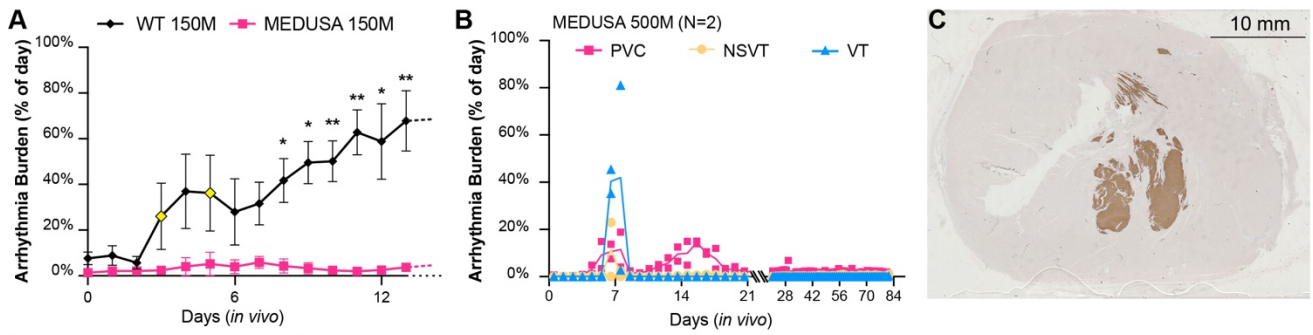

**D** Engraftment (Graft mass) **E** Electrical signal traveling from graft to host (3 months endpoint)

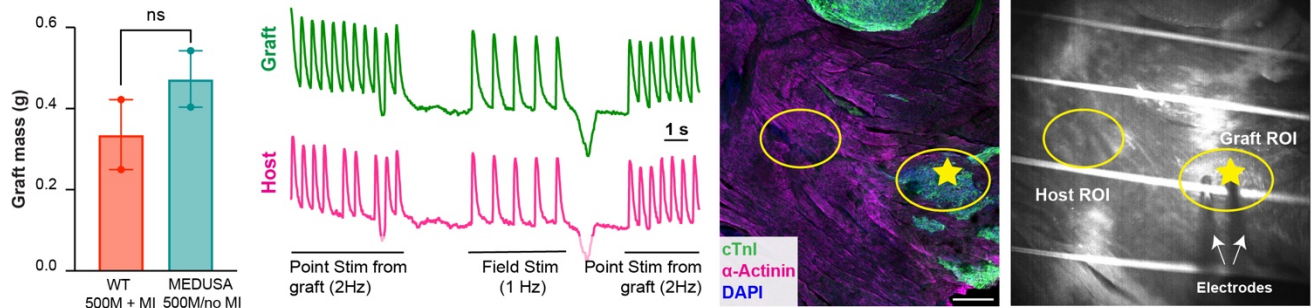

**Supplementary Figure 6. Characterization of transplanted MEDUSA hESC-CMs.** (A) Daily arrhythmia burden focused on the first 2 weeks after transplantation for animals receiving  $150 \times 10^6$  (150M) WT or MEDUSA hESC-CMs (See also Fig. 6A for arrhythmia burden over 7-weeks observation period). Differences vs. WT by multiple unpaired t-test (\*  $p < 0.05$  and \*\*  $p < 0.01$ ). Yellow-colored symbols indicate animals that reached EA endpoint as detailed in Fig. 6A and Methods section. (B) Quantification of EA burden divided in PVCs, VT and NSVT for both 500M MEDUSA animals in the first 3 weeks after transplantation. See also Methods section for details on EA characterization. (C) Whole-slide scanning showing MEDUSA grafts at 500M dose at 3 months after transplantation. (D) Graft mass of 500M MEDUSA hESC-CMs transplanted into the uninjured pig heart compared to 500M WT hESC-CMs transplanted into infarcted animals. Data shown as average  $\pm$  SEM, differences by Mann-Whitney test. For 500M WT hESC-CMs + MI, data points from Nakamura K., *et al.*, *Stem Cell Reports* 2021. (E) Cardiac slice model of 12 weeks old MEDUSA-CMs grafts. Left panel showing Fluo-4 traces of cardiac slice paced with field and point stimulation from graft region with relative immunofluorescence and monochromatic images on the right side. Yellow circle indicates ROI for Fluo-4 recording, yellow star indicates point stimulation location. Scale bar = 500  $\mu$ m. See also Supplementary Video 3.

**Supplementary Table 1. Extended top 40 GO terms from Supplementary Fig. 1B.**

Top 40 upregulated GO terms 3 months in vivo vs in vitro

| <i>GO term</i>                                                | <b>-LogFDR</b> |
|---------------------------------------------------------------|----------------|
| <b>mitochondrial ATP synthesis coupled electron transport</b> | 26.7593509     |
| <b>ATP synthesis coupled electron transport</b>               | 26.7593509     |
| <i>respiratory electron transport chain</i>                   | 26.7593509     |
| <i>oxidative phosphorylation</i>                              | 26.7593509     |
| <i>cellular respiration</i>                                   | 26.7593509     |
| <i>muscle system process</i>                                  | 24.905479      |
| <b>electron transport chain</b>                               | 24.905479      |
| <i>muscle contraction</i>                                     | 24.3724063     |
| <b>energy derivation by oxidation of organic compounds</b>    | 23.8385322     |
| <b>ATP metabolic process</b>                                  | 23.7816273     |
| <b>mitochondrial electron transport, NADH to ubiquinone</b>   | 23.4889897     |
| <i>purine ribonucleotide metabolic process</i>                | 22.4583209     |
| <b>purine ribonucleoside monophosphate metabolic process</b>  | 22.4583209     |
| <b>purine nucleoside monophosphate metabolic process</b>      | 22.400329      |
| <b>purine ribonucleoside triphosphate metabolic process</b>   | 22.1572909     |
| <b>mitochondrial respiratory chain complex assembly</b>       | 21.8021029     |
| <b>ribonucleoside triphosphate metabolic process</b>          | 21.6997652     |
| <b>purine nucleoside triphosphate metabolic process</b>       | 21.6435556     |
| <b>nucleoside triphosphate metabolic process</b>              | 21.6148587     |
| <b>ribonucleoside monophosphate metabolic process</b>         | 21.4475971     |
| <b>NADH dehydrogenase complex assembly</b>                    | 21.0603809     |
| <i>mitochondrial respiratory chain complex I assembly</i>     | 21.0603809     |
| <b>nucleoside monophosphate metabolic process</b>             | 20.6662339     |
| <b>generation of precursor metabolites and energy</b>         | 19.0256188     |
| <i>muscle cell development</i>                                | 16.1158982     |
| <b>striated muscle contraction</b>                            | 15.5888635     |
| <b>mitochondrion organization</b>                             | 15.1695254     |
| <b>striated muscle cell development</b>                       | 14.9634709     |
| <b>heart process</b>                                          | 13.3913741     |
| <b>heart contraction</b>                                      | 13.3913741     |
| <i>myofibril assembly</i>                                     | 12.7808906     |
| <b>striated muscle tissue development</b>                     | 11.6790402     |
| <b>muscle tissue development</b>                              | 10.8758565     |
| <b>cardiac muscle contraction</b>                             | 10.8758565     |
| <b>cellular component assembly involved in morphogenesis</b>  | 10.5252677     |
| <b>mitochondrial translational elongation</b>                 | 10.5027401     |
| <b>mitochondrial translational termination</b>                | 10.3981337     |
| <b>striated muscle cell differentiation</b>                   | 10.3179452     |
| <b>muscle cell differentiation</b>                            | 9.92716966     |
| <b>sarcomere organization</b>                                 | 9.89901292     |

Top 40 downregulated GO terms 3 months in vivo vs in vitro

| <i>GO term</i>                                                                         | <b>-LogFDR</b> |
|----------------------------------------------------------------------------------------|----------------|
| <i>extracellular matrix organization</i>                                               | 17.7593509     |
| extracellular structure organization                                                   | 17.1853197     |
| <i>angiogenesis</i>                                                                    | 12.9354422     |
| <i>collagen fibril organization</i>                                                    | 11.8842897     |
| response to transforming growth factor beta                                            | 8.36141092     |
| cellular response to transforming growth factor beta stimulus                          | 8.31441435     |
| <i>regulation of cellular response to growth factor stimulus</i>                       | 8.31441435     |
| <i>transmembrane receptor protein serine/threonine kinase signaling pathway</i>        | 8.20004291     |
| <i>glycoprotein metabolic process</i>                                                  | 7.97323075     |
| negative regulation of cellular component movement                                     | 7.77955431     |
| <i>tissue migration</i>                                                                | 7.77955431     |
| ameboidal-type cell migration                                                          | 7.54849756     |
| epithelial cell migration                                                              | 7.25524618     |
| negative regulation of locomotion                                                      | 7.19507949     |
| endothelial cell migration                                                             | 7.19507949     |
| epithelium migration                                                                   | 7.18531966     |
| epithelial cell proliferation                                                          | 7.14470181     |
| regulation of transmembrane receptor protein serine/threonine kinase signaling pathway | 7.11153344     |
| ossification                                                                           | 7.1086856      |
| urogenital system development                                                          | 6.99968308     |
| transforming growth factor beta receptor signaling pathway                             | 6.93544218     |
| glycoprotein biosynthetic process                                                      | 6.8465011      |
| kidney development                                                                     | 6.82004877     |
| <i>response to oxygen levels</i>                                                       | 6.79713949     |
| skeletal system development                                                            | 6.28222967     |
| aminoglycan biosynthetic process                                                       | 6.24490535     |
| <i>mesenchyme development</i>                                                          | 6.21299108     |
| renal system development                                                               | 6.12732771     |
| response to endoplasmic reticulum stress                                               | 6.09141515     |
| negative regulation of cell motility                                                   | 6.0323522      |
| glycosaminoglycan biosynthetic process                                                 | 5.99544011     |
| mesenchymal cell differentiation                                                       | 5.99166511     |
| cholesterol biosynthetic process                                                       | 5.99166511     |
| secondary alcohol biosynthetic process                                                 | 5.99166511     |
| negative regulation of cellular response to growth factor stimulus                     | 5.99166511     |
| regulation of vasculature development                                                  | 5.92648734     |
| response to decreased oxygen levels                                                    | 5.80131543     |
| response to hypoxia                                                                    | 5.80131543     |
| cell-substrate adhesion                                                                | 5.7220266      |
| chondrocyte differentiation                                                            | 5.66680572     |

**Supplementary Table 2. Graft size quantification.**

| <i>Animal</i>                          | <i>Procedure</i>   | <i>Cell Prep<sup>a</sup></i> | <i>%Area graft<sup>b</sup></i> | <i>%Graft size<sup>c</sup></i> | <i>Endpoint</i>       | <i>EA observed<sup>d</sup></i> |
|----------------------------------------|--------------------|------------------------------|--------------------------------|--------------------------------|-----------------------|--------------------------------|
| <i>WT #1</i>                           | Catheter           | SC                           | 0.245%                         | 0.00310%                       | Endpoint 2 weeks      | Yes                            |
| <i>WT #2</i>                           | Catheter           | SC                           | 0.742%                         | 0.00932%                       | Euthanized day 6      | Yes, rapid                     |
| <i>WT #3</i>                           | Catheter           | SC                           | 1.676%                         | 0.01275%                       | Endpoint 2 weeks      | Yes                            |
| <i>WT #4</i>                           | Direct thoracotomy | SC                           | NA                             | NA                             | Amiodarone at day 4   | Yes, rapid                     |
| <i>WT #5</i>                           | Direct thoracotomy | SC                           | NA                             | NA                             | Endpoint 5 weeks      | Yes                            |
| <i>WT #6</i>                           | Direct thoracotomy | SC                           | NA                             | NA                             | Amiodarone at 2 weeks | Yes, rapid                     |
| <i>WT #7</i>                           | Direct thoracotomy | SC                           | NA                             | NA                             | Endpoint 3 months     | Yes                            |
| <i>HCN4 KO #1</i>                      | Catheter           | SC                           | 0.913%                         | 0.00953%                       | Endpoint 4 weeks      | Yes                            |
| <i>HCN4 KO #2</i>                      | Catheter           | SC                           | 2.351%                         | 0.02200%                       | Endpoint 4 weeks      | Yes                            |
| <i>HCN4 KO/KCNJ2 KI #1</i>             | Catheter           | SC                           | 0.986%                         | 0.01574%                       | Euthanized day 7      | Yes, rapid                     |
| <i>HCN4 KO/KCNJ2 KI #2</i>             | Catheter           | SC                           | 0.120%                         | 0.00128%                       | Euthanized day 9      | Yes, rapid                     |
| <i>HCN4 KO/CACNA1H 2KO/KCNJ2 KI #1</i> | Catheter           | SC                           | 4.116%                         | 0.04128%                       | Euthanized day 8      | Yes, rapid                     |
| <i>HCN4 KO/SLC8A1 2KO/KCNJ2 KI #1</i>  | Direct thoracotomy | Mono                         | 2.444%                         | 0.03165%                       | Euthanized day 7      | Yes, rapid                     |
| <i>HCN4 KO/SLC8A1 2KO/KCNJ2 KI #2</i>  | Direct thoracotomy | Mono                         | 0.294%                         | 0.00367%                       | Endpoint 4 weeks      | No                             |
| <i>HCN4 KO/SLC8A1 2KO/KCNJ2 KI #3</i>  | Direct thoracotomy | Mono                         | 6.281%                         | 0.05714%                       | Endpoint 4 weeks      | No                             |
| <i>MEDUSA #1</i>                       | Direct thoracotomy | Mono                         | 0.747%                         | 0.00837%                       | Endpoint 4 weeks      | No                             |
| <i>MEDUSA #2</i>                       | Direct thoracotomy | Mono                         | 2.701%                         | 0.02459%                       | Endpoint 4 weeks      | No                             |
| <i>MEDUSA #3</i>                       | Direct thoracotomy | SC                           | 9.284%                         | 0.07453%                       | Endpoint 7 weeks      | No                             |
| <i>MEDUSA 500M #1</i>                  | Direct thoracotomy | SC                           | 36.94%                         | 0.29081%                       | Endpoint 3 months     | Yes, self-terminating          |
| <i>MEDUSA 500M #2</i>                  | Direct thoracotomy | SC                           | 28.70%                         | 0.24330%                       | Endpoint 3 months     | Yes, self-terminating          |

<sup>a</sup> SC: suspension culture differentiation; Mono: monolayer differentiation

<sup>b</sup> %Area graft expressed as percentage of the relative myocardial section.

<sup>c</sup> %Graft size: (% area graft x block weight) / left ventricle mass.

<sup>d</sup> Rapid indicates extreme tachycardia over 300 beats per minute necessitating euthanasia

**Supplementary Table 3. Oligonucleotides sequences for cloning gRNAs and genotyping.**

| Primer Name       | Sequence                                                                                 | Target                                        |
|-------------------|------------------------------------------------------------------------------------------|-----------------------------------------------|
| HCN4_gRNA1_FWD    | CACCGTCGTGAAGCGGACAATGCGC                                                                | HCN4 gRNA1                                    |
| HCN4_gRNA1_RVS    | AAACGCGCATTGTCCGCTTCACGAC                                                                |                                               |
| CACNA1H_gRNA1_FWD | CACCGGATTTCTTCATCGTCGTGG                                                                 | CACNA1H gRNA1                                 |
| CACNA1H_gRNA1_RVS | AAACCCACGACGATGAAGAAATCC                                                                 |                                               |
| HCN4_gRNA1_KI_FWD | CACCGCAGCTTGTCCATGGCGCCAG                                                                | HCN4 KO_KCNJ2 gRNA1                           |
| HCN4_gRNA1_KI_RVS | AAACCTGGCGCCATGGACAAGCTGC                                                                |                                               |
| HCN4_gRNA2_KI_FWD | CACCGGCAGCTTGTCCATGGCGCC                                                                 | HCN4 KO_KCNJ2 gRNA2                           |
| HCN4_gRNA2_KI_RVS | AAACGGCGCCATGGACAAGCTGCC                                                                 |                                               |
| SLC8A1_gRNA1      | GGAUCAUAUUACUGUAAGAA                                                                     | SLC8A1 gRNA1                                  |
| SLC8A1_gRNA2      | CAGCAAUUACAUGGUCCACA                                                                     | SLC8A1 gRNA2                                  |
| SLC8A1_gRNA3      | UGAAAUCCCAUUGAAAAGGU                                                                     | SLC8A1 gRNA3                                  |
| HCN4-KI_5HA_FW    | gaatgctgagatATTGGGTCgcgccgcACGAACC<br>CGGTCGCCTCCCA                                      | Cloning HCN4 5' HA                            |
| HCN4-KI_5HA_REV   | TGGCTGATCATTAAATTAAGCGGGTTTAAACG<br>GGCCCATGGCGCCAGGGCCGG                                |                                               |
| HCN4-KI_3HA_FW    | AAAGAGAGAGCAATATTTCAAGAATGCAtcgt<br>caatttacgcagactatcttctagggTTAAGACAAGCTG<br>CCGCCGTCC | Cloning HCN4 3' HA                            |
| HCN4-KI_3HA_REV   | ggtcccggcatccgatACCCAATggcgcgccGGCTGAA<br>TGACCCGGAGCTG                                  |                                               |
| pA_FW             | AAACCCGCTTAATTAATGATCAGCCATCGATT<br>CGActgtgccttctagtggcag                               | Cloning polyA                                 |
| pA_REV            | AATTTTACGCATGATTATCTTTAACGgtacgtcaca<br>atatgattatcttctagggTTAAacctatagagcccaccgc        |                                               |
| EGFP_Amp_FW       | GACCTTAACCatggtgagcaaggg                                                                 | Cloning EGFP                                  |
| EGFP_Amp_REV      | GGTTCCATCGATtactgttacagctcgtccatg                                                        |                                               |
| eSpCas9_seq       | GGCCTATTTCCCATGATTCCT                                                                    | Sequencing pX459 and pX330<br>cloned plasmids |
| HCN4_gen_FWD      | GAGAACACCACACCCTGGATT                                                                    | Genotype HCN4 KO clones                       |
| HCN4_gen_RVS      | TGCCACAATCTGACAGCCTAT                                                                    |                                               |
| CACNA1H_gen_FWD   | TTTCCTGATGAGCCAACGCC                                                                     | Genotype CACNA1H KO<br>clones                 |
| CACNA1H_gen_RVS   | CCGGTCACTTACTAGGCACG                                                                     |                                               |
| SLC8A1_gen_FWD    | TCATGTACAACATGCGGCGA                                                                     | Genotype SLC8A1 KO clones                     |
| SLC8A1_gen_RVS    | CTCCGTCAGGCACCACATAA                                                                     |                                               |
| WT_PCR_FWD        | CACCCTGCCCATGTCACAGG                                                                     | Genotype HCN4 KO_KCNJ2<br>KI clones           |
| WT_PCR_RVS        | GTGACTTCGGTCCTCCAGGG                                                                     |                                               |
| 5'INS_FWD         | CACCCTGCCCATGTCACAGG                                                                     |                                               |
| 5'INS_RVS         | CGTCAATTTTACGCATGATTATCTTTAAC                                                            |                                               |
| 3'INS_FWD         | GCGACGGATTCGCGCTATTTAGAAAG                                                               |                                               |
| 3'INS_RVS         | GTGACTTCGGTCCTCCAGGG                                                                     |                                               |
| 5'PLAS_FWD        | GAGCGGATAACAATTTACACACAGG                                                                |                                               |
| 5'PLAS_RVS        | GCGACGGATTCGCGCTATTTAGAAAG                                                               |                                               |

|            |                               |  |
|------------|-------------------------------|--|
| 3'PLAS_FWD | CGTCAATTTTACGCATGATTATCTTTAAC |  |
| 3'PLAS_RVS | AGGGTTTTCCAGTCACGACGTT        |  |

**Supplementary Table 4. Oligonucleotides sequences for RTqPCR**

| Gene target | Sequence                   |
|-------------|----------------------------|
| HCN4_FWD    | GATCCTCAGCCTCTTACGCC       |
| HCN4_RVS    | CCCCAGGAGTTGTTACCCAT       |
| HCN1_FWD    | ATGGTAATCCAGAGGTCAGACA     |
| HCN1_RVS    | TTCTTCGAGGCGGCAGTATC       |
| HCN2_FWD    | GGCATGGTGAACCACTCGT        |
| HCN2_RVS    | TGTA CTGCTCCACCTGCTTG      |
| HCN3_FWD    | GGTTCCTGGTTGACCTCATCT      |
| HCN3_RVS    | GTGAAAGATCTCCTCCCACTGGT    |
| CACNA1H_FWD | ATGCTGGTAATCATGCTCAACTG    |
| CACNA1H_RVS | AAAAGGCGAAAATGAAGGCGT      |
| CACNA1G_FWD | CGCCATCTTCCAGGTCATCA       |
| CACNA1G_RVS | TCTGAGAACTGCGTGGCAAT       |
| CACNA1I_FWD | GGATGGAGCTGATCCTCATGT      |
| CACNA1I_RVS | AAGATGAAGTCATCAAAGACCTGC   |
| KCNJ2_FWD   | GTGCGAACCAACCGCTACA        |
| KCNJ2_RVS   | CCAGCGAATGTCCACACAC        |
| SLC8A1_FWD  | AGACCTGGCTTCCCACTTTG       |
| SLC8A1_RVS  | TGGCAAATGTGTCTGGCACT       |
| SLC81A2_FWD | GTA CTGCCTCTTGGAGCAT       |
| SLC81A2_RVS | CACACCGGGAAGAAGACCAG       |
| SLC81A3_FWD | CCGAAATGGATGGAACGTGG       |
| SLC81A3_RVS | GAATGGGTCCCCACAACCAA       |
| TNNT2_FWD   | TTCACCAAAGATCTGCTCCTCGCT   |
| TNNT2_RVS   | TTATTACTGGTGTGGAGTGGGTGTGG |
| HPRT_FWD    | TGACACTGGCAAAACAATGCA      |
| HPRT_RVS    | GGTCCTTTTCACCAGCAAGCT      |
